# Supplementary material
Source: PubMed Central journal article supplement (PMC5663277)

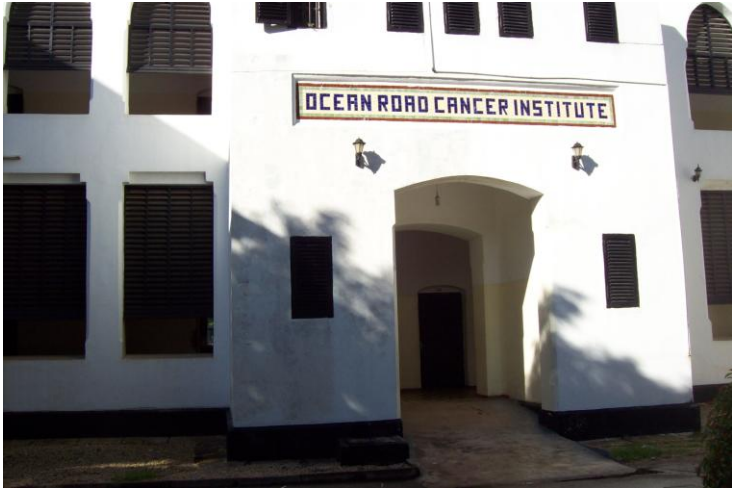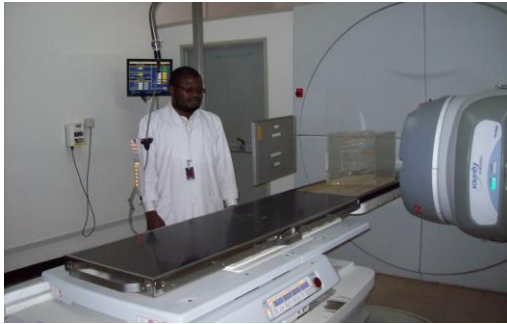

Supplement: NIHMS891488-supplement-supplemental.pdf [file NIHMS891488-supplement-supplemental.pdf]
